# Supplementary material for: Oral Polio Vaccine Campaigns May Reduce the Risk of Death from Respiratory Infections
Source: MDPI journal article supplement (doi:10.3390/vaccines9101133), 2021-10-04

**Supplementary Table S1. Diagnoses for cause of deaths, number of deaths and defined categories categories. Note that all deaths before 29 days of age are categorised as neonatal deaths.**

| Cause of death                    | Number of deaths | Category              |
|-----------------------------------|------------------|-----------------------|
| Acute resp infect, incl pneumonia | 127              | Respiratory infection |
| Measles                           | 4                | Respiratory infection |
| Pertussis                         | 2                | Respiratory infection |
| Asthma                            | 1                | Respiratory infection |
| Meningitis and encephalitis       | 53               | Other cause           |
| Acute abdomen                     | 17               | Other cause           |
| Diarrhoeal diseases               | 16               | Other cause           |
| HIV/AIDS related death            | 13               | Other cause           |
| Severe malnutrition               | 12               | Other cause           |
| Epilepsy                          | 9                | Other cause           |
| Congenital malformation           | 7                | Other cause           |
| Sepsis (non-obstetric)            | 6                | Other cause           |
| Other and unspecified infect dis  | 5                | Other cause           |
| Other and unspecified cardiac dis | 4                | Other cause           |
| Sickle cell with crisis           | 2                | Other cause           |
| Liver cirrhosis                   | 2                | Other cause           |
| Renal failure                     | 1                | Other cause           |
| Acute cardiac disease             | 1                | Other cause           |
| Other and unspecified neoplasms   | 1                | Other cause           |
| Neonatal pneumonia                | 48               | Neonatal death        |
| Neonatal sepsis                   | 26               | Neonatal death        |
| Prematurity                       | 16               | Neonatal death        |
| Other and unspecified neonatal Co | 12               | Neonatal death        |
| Birth asphyxia                    | 7                | Neonatal death        |
| Accid drowning and submersion     | 53               | Accident              |
| Other transport accident          | 11               | Accident              |
| Other and unspecified external Co | 2                | Accident              |
| Road traffic accident             | 2                | Accident              |
| Accid expos to smoke, fire & flam | 1                | Accident              |
| Contact with venomous plant/anima | 1                | Accident              |
| Assault                           | 1                | Accident              |
| Accid fall                        | 1                | Accident              |
| Indeterminate                     | 31               | Missing cause         |

**Supplementary Table S2. Deaths by cause of death, age group and timing of death in relation to oral polio vaccine campaigns among children within the Chakaria HDSS from 2012 to 2019.**

|                        | Number of deaths (rate per 100 person-years, person-years) |                 |                                                 |                   |                             |                  |                   |
|------------------------|------------------------------------------------------------|-----------------|-------------------------------------------------|-------------------|-----------------------------|------------------|-------------------|
|                        | Neonatal period (<29 days)                                 |                 | Post-neonatal infant period (29 days-11 months) |                   | Child period (12-35 months) |                  | Total             |
|                        | After-campaign                                             | Before-campaign | After-campaign                                  | Before-campaign   | After-campaign              | Before-campaign  |                   |
| Neonatal deaths        | 1 (10.2, 10)                                               | 168 (17.0, 988) |                                                 |                   |                             |                  | 169 (16.94, 998)  |
| Respiratory infections |                                                            |                 | 6 (0.31, 1907)                                  | 104 (0.86, 12147) | 9 (0.08, 10613)             | 15 (0.09, 16086) | 134 (0.33, 40753) |
| Other causes           |                                                            |                 | 10 (0.52, 1907)                                 | 59 (0.49, 12147)  | 14 (0.13, 10613)            | 20 (0.12, 16086) | 103 (0.25, 40753) |
| Accidents              |                                                            |                 | 0 (0.00, 1907)                                  | 7 (0.06, 12147)   | 24 (0.23, 10613)            | 41 (0.25, 16086) | 72 (0.18, 40753)  |
| Missing cause          |                                                            |                 | 1 (0.05, 1907)                                  | 12 (0.10, 12147)  | 3 (0.03, 10613)             | 2 (0.01, 16086)  | 18 (0.04, 40753)  |

Supplementary Table S3. Mortality rates (per 100 person-years) and hazard ratios (HR) for after-campaign versus before-campaign for children only eligible to oral polio vaccine (OPV), by cause of death and age group. Analysis from 29 days to 35 months of age among children within the Chakaria HDSS from 2012 to 2019.

**Respiratory infections**

| Campaign            | Mortality rates per 100 person years<br>(deaths / person years) |                  | HR (After/Before-<br>campaign) (95% CI) #1 | Main model<br>HR (After/Before-<br>campaign) (95% CI) #2 |
|---------------------|-----------------------------------------------------------------|------------------|--------------------------------------------|----------------------------------------------------------|
|                     | After-campaign                                                  | Before-campaign  |                                            |                                                          |
| 29 days – 11 months |                                                                 |                  |                                            |                                                          |
| Campaign-OPV-only   | 0.31 (6/1907)                                                   | 0.86 (104/12147) | 0.45 (0.20-1.00)*                          | 0.40 (0.18-0.91)*                                        |
| Campaign-OPV+VAS    | 0.40 (4/1000)                                                   | 0.81 (106/13055) | 0.73 (0.27-1.95)                           | 1.19 (0.45-3.17)                                         |
| Campaign-OPV+MV     | 1.78 (1/56)                                                     | 0.78 (109/13998) | 4.95 (0.64-38.5)                           | 8.54 (0.99-73.7)                                         |
| Campaign-VAS-only   | 0.51 (15/2922)                                                  | 0.85 (95/11133)  | 1.19 (0.62-2.26)                           | 1.08 (0.57-2.05)                                         |
| Campaign-MV-only    | 1.88 (1/53)                                                     | 0.78 (109/14001) | 18.0 (1.60-203)*                           | 18.1 (1.60-205)*                                         |
| 12 – 35 months      |                                                                 |                  |                                            |                                                          |
| Campaign-OPV-only   | 0.08 (9/10613)                                                  | 0.09 (15/16086)  | 0.58 (0.19-1.73)                           | 0.32 (0.08-1.24)                                         |
| Campaign-OPV+VAS    | 0.07 (3/4043)                                                   | 0.09 (21/22656)  | 0.68 (0.20-2.27)                           | 1.58 (0.44-5.64)                                         |
| Campaign-OPV+MV     | 0.11 (5/4715)                                                   | 0.09 (19/21984)  | 1.40 (0.40-4.98)                           | 2.14 (0.51-8.92)                                         |
| Campaign-VAS-only   | 0.08 (17/20047)                                                 | 0.11 (7/6652)    | 0.96 (0.29-3.16)                           | 0.92 (0.34-2.47)                                         |
| Campaign-MV-only    | 0.04 (2/4777)                                                   | 0.10 (22/21922)  | 0.55 (0.12-2.45)                           | 0.51 (0.11-2.34)                                         |

# Other causes

| Campaign            | Mortality rates per 100 person years<br>(deaths / person years) |                 | HR (After/Before-<br>campaign) (95% CI) #1 | Main model<br>HR (After/Before-<br>campaign) (95% CI) #2 |
|---------------------|-----------------------------------------------------------------|-----------------|--------------------------------------------|----------------------------------------------------------|
|                     | After-campaign                                                  | Before-campaign |                                            |                                                          |
| 29 days – 11 months |                                                                 |                 |                                            |                                                          |
| Campaign-OPV-only   | 0.52 (10/1907)                                                  | 0.49 (59/12147) | 1.18 (0.56-2.49)                           | 1.40 (0.68-2.90)                                         |
| Campaign-OPV+VAS    | 0.30 (3/1000)                                                   | 0.51 (66/13055) | 0.48 (0.15-1.50)                           | 0.47 (0.15-1.50)                                         |
| Campaign-OPV+MV     | 3.56 (2/56)                                                     | 0.48 (67/13998) | 13.8 (2.76-69.0)*                          | 10.6 (1.93-58.5)*                                        |
| Campaign-VAS-only   | 0.55 (16/2922)                                                  | 0.48 (53/11133) | 1.65 (0.84-3.24)                           | 1.61 (0.83-3.09)                                         |
| Campaign-MV-only    | 0.00 (0/53)                                                     | 0.49 (69/14001) | -                                          | -                                                        |
| 12 – 35 months      |                                                                 |                 |                                            |                                                          |
| Campaign-OPV-only   | 0.13 (14/10613)                                                 | 0.12 (20/16086) | 0.62 (0.20-1.86)                           | 0.82 (0.25-2.73)                                         |
| Campaign-OPV+VAS    | 0.15 (6/4043)                                                   | 0.12 (28/22656) | 0.84 (0.30-2.39)                           | 0.79 (0.20-3.10)                                         |
| Campaign-OPV+MV     | 0.08 (4/4715)                                                   | 0.14 (30/21984) | 0.49 (0.14-1.67)                           | 0.41 (0.11-1.47)                                         |
| Campaign-VAS-only   | 0.13 (26/20047)                                                 | 0.12 (8/6652)   | 1.03 (0.32-3.33)                           | 0.94 (0.39-2.25)                                         |
| Campaign-MV-only    | 0.13 (6/4777)                                                   | 0.13 (28/21922) | 1.68 (0.64-4.40)                           | 1.58 (0.57-4.36)                                         |

#1: Adjusting for age (underlying time) and year\*age group.

#2: Main multivariable model: adjusting for age (underlying time), OPV, OPV+VAS, OPV+MV, VAS, MV and year\*age group.

\* p<0.05.

VAS = vitamin A supplementation, MV = measles vaccine.

Supplementary Table S4. Mortality rates (per 100 person-years) and hazard ratios (HR) for after-campaign versus before-campaign for any campaign including oral polio vaccine (OPV) (i.e. also co-administered with vitamin A supplement (VAS) and measles vaccine (MV)), by cause of death. Analysis from 29 days to 35 months of age among children within the Chakaria HDSS from 2012 to 2019.

**Respiratory infections**

| Campaign            | Mortality rates per 100 person years<br>(deaths / person years) |                  | HR (After/Before-<br>campaign) (95% CI) #1 | Main model<br>HR (After/Before-<br>campaign) (95% CI) #2 |
|---------------------|-----------------------------------------------------------------|------------------|--------------------------------------------|----------------------------------------------------------|
|                     | After-campaign                                                  | Before-campaign  |                                            |                                                          |
| 29 days – 11 months |                                                                 |                  |                                            |                                                          |
| Any-campaign-OPV    | 0.34 (7/2074)                                                   | 0.86 (103/11981) | 0.55 (0.27-1.14)                           | 0.56 (0.27-1.16)                                         |
| Campaign-VAS-only   | 0.51 (15/2922)                                                  | 0.85 (95/11133)  | 1.21 (0.65-2.27)                           | 1.15 (0.62-2.13)                                         |
| Campaign-MV-only    | 1.88 (1/53)                                                     | 0.78 (109/14001) | 8.53 (1.04-69.8)*                          | 8.20 (1.01-66.3)*                                        |
| 12 – 35 months      |                                                                 |                  |                                            |                                                          |
| Any-campaign-OPV    | 0.08 (9/10613)                                                  | 0.09 (15/16086)  | 0.71 (0.17-3.01)                           | 0.71 (0.16-3.15)                                         |
| Campaign-VAS-only   | 0.08 (17/20047)                                                 | 0.11 (7/6652)    | 0.91 (0.35-2.37)                           | 1.06 (0.44-2.54)                                         |
| Campaign-MV-only    | 0.04 (2/4777)                                                   | 0.10 (22/21922)  | 0.59 (0.13-2.61)                           | 0.51 (0.11-2.31)                                         |
| Combined            |                                                                 |                  |                                            |                                                          |
| Any-campaign-OPV    | 0.13 (16/12687)                                                 | 0.42 (118/28067) | 0.59 (0.31-1.12)                           | 0.59 (0.31-1.15)                                         |
| Campaign-VAS-only   | 0.14 (32/22968)                                                 | 0.57 (102/17785) | 1.14 (0.66-1.98)                           | 1.08 (0.60-1.94)                                         |
| Campaign-MV-only    | 0.06 (3/4830)                                                   | 0.36 (131/35923) | 0.94 (0.23-3.78)                           | 0.84 (0.20-3.51)                                         |

#1: Adjusting for age (underlying time) and year\*age group.

#2: Main multivariable model: adjusting for age (underlying time), any-OPV, VAS, MV and year\*age group.

\* p<0.05.

# Other causes

| Campaign            | Mortality rates per 100 person years<br>(deaths / person years) |                 | HR (After/Before-<br>campaign) (95% CI) #1 | Main model<br>HR (After/Before-<br>campaign) (95% CI) #2 |
|---------------------|-----------------------------------------------------------------|-----------------|--------------------------------------------|----------------------------------------------------------|
|                     | After-campaign                                                  | Before-campaign |                                            |                                                          |
| 29 days – 11 months |                                                                 |                 |                                            |                                                          |
| Any-campaign-OPV    | 0.48 (10/2074)                                                  | 0.49 (59/11981) | 0.98 (0.46-2.09)                           | 1.03 (0.48-2.20)                                         |
| Campaign-VAS-only   | 0.55 (16/2922)                                                  | 0.48 (53/11133) | 1.65 (0.84-3.24)                           | 1.65 (0.85-3.20)                                         |
| Campaign-MV-only    | 0.00 (0/53)                                                     | 0.49 (69/14001) | -                                          | -                                                        |
| 12 – 35 months      |                                                                 |                 |                                            |                                                          |
| Any-campaign-OPV    | 0.13 (14/10613)                                                 | 0.12 (20/16086) | 0.62 (0.20-1.86)                           | 0.72 (0.23-2.30)                                         |
| Campaign-VAS-only   | 0.13 (26/20047)                                                 | 0.12 (8/6652)   | 1.03 (0.32-3.33)                           | 0.98 (0.42-2.27)                                         |
| Campaign-MV-only    | 0.13 (6/4777)                                                   | 0.13 (28/21922) | 1.68 (0.64-4.40)                           | 1.48 (0.54-4.05)                                         |
| Combined            |                                                                 |                 |                                            |                                                          |
| Any-campaign-OPV    | 0.19 (24/12687)                                                 | 0.28 (79/28067) | 0.84 (0.44-1.61)                           | 0.92 (0.47-1.79)                                         |
| Campaign-VAS-only   | 0.18 (42/22968)                                                 | 0.34 (61/17785) | 1.45 (0.78-2.68)                           | 1.38 (0.73-2.61)                                         |
| Campaign-MV-only    | 0.12 (6/4830)                                                   | 0.27 (97/35923) | 1.60 (0.63-4.08)                           | 1.42 (0.53-3.77)                                         |

#1: Adjusting for age (underlying time) and year\*age group.

#2: Main multivariable model: adjusting for age (underlying time), any-OPV, VAS, MV and year\*age group.

\* p<0.05.

Supplementary Figure S1. Schoenfeld residual plots for the main multivariable model for respiratory infections.

## Supplementary Figure 1

Plots of schoenfeld residuals for the full multivariable model

Global PH-test:  $p=0.60$

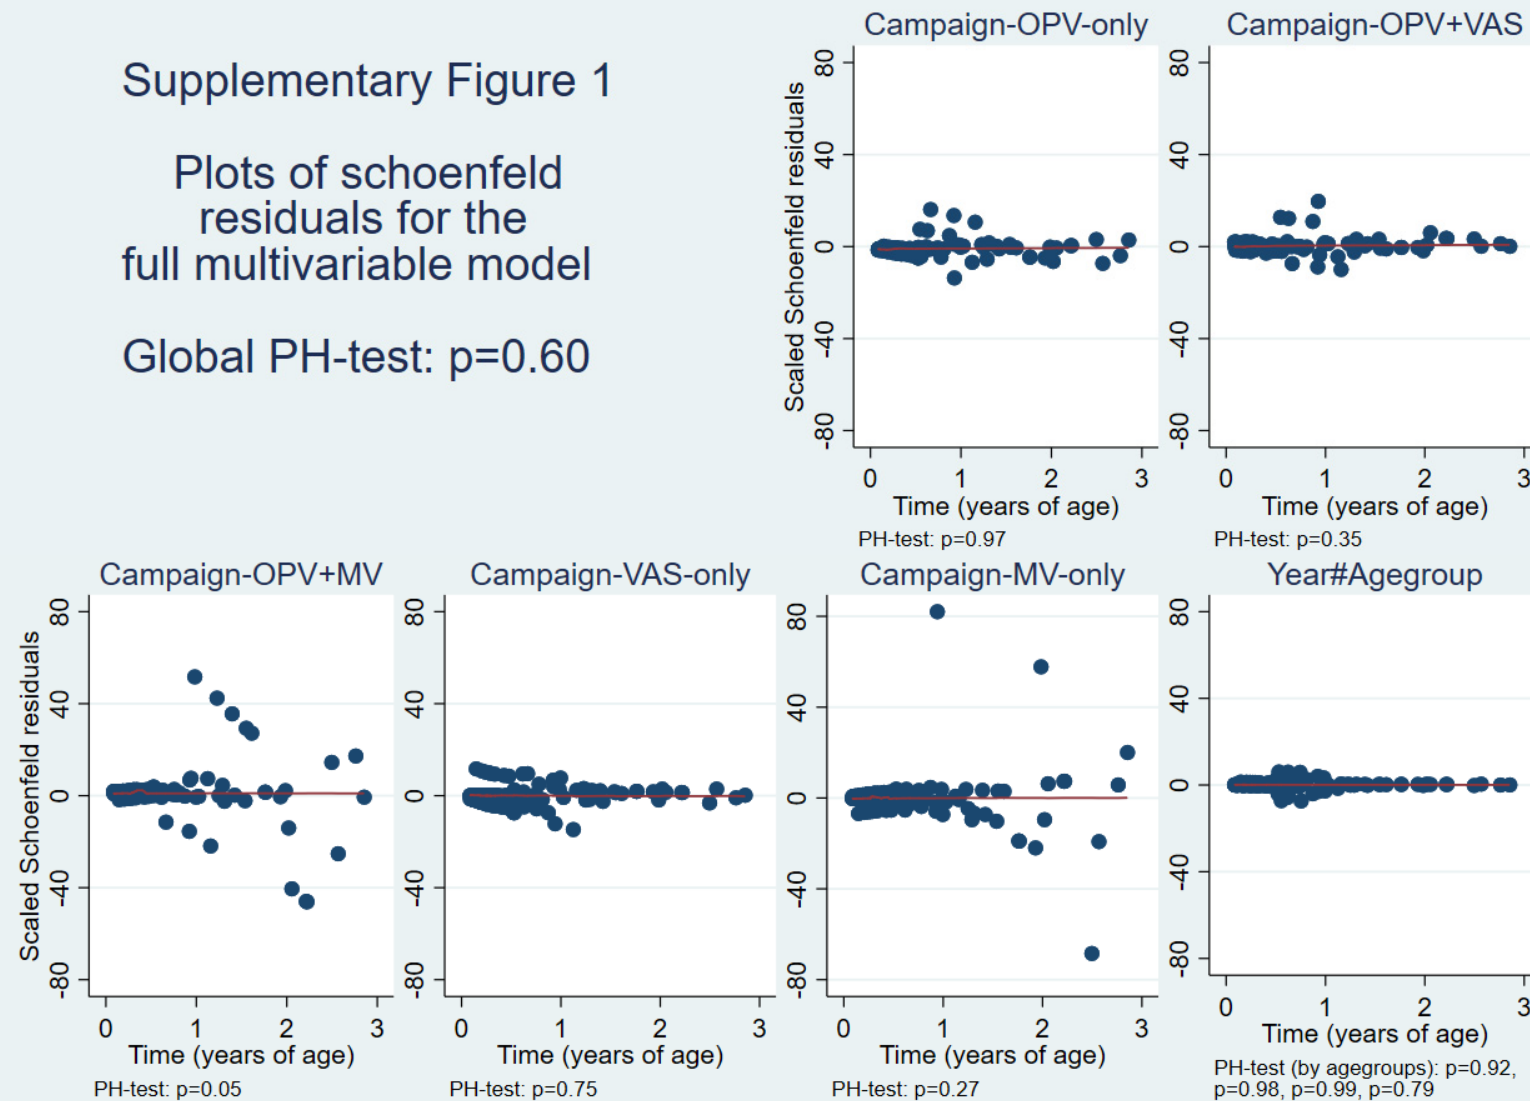

Supplementary Figure S2. Schoenfeld residual plots for the main multivariable model for other causes.

## Supplementary Figure 2

Plots of schoenfeld residuals for the full multivariable model

Global PH-test:  $p=0.88$

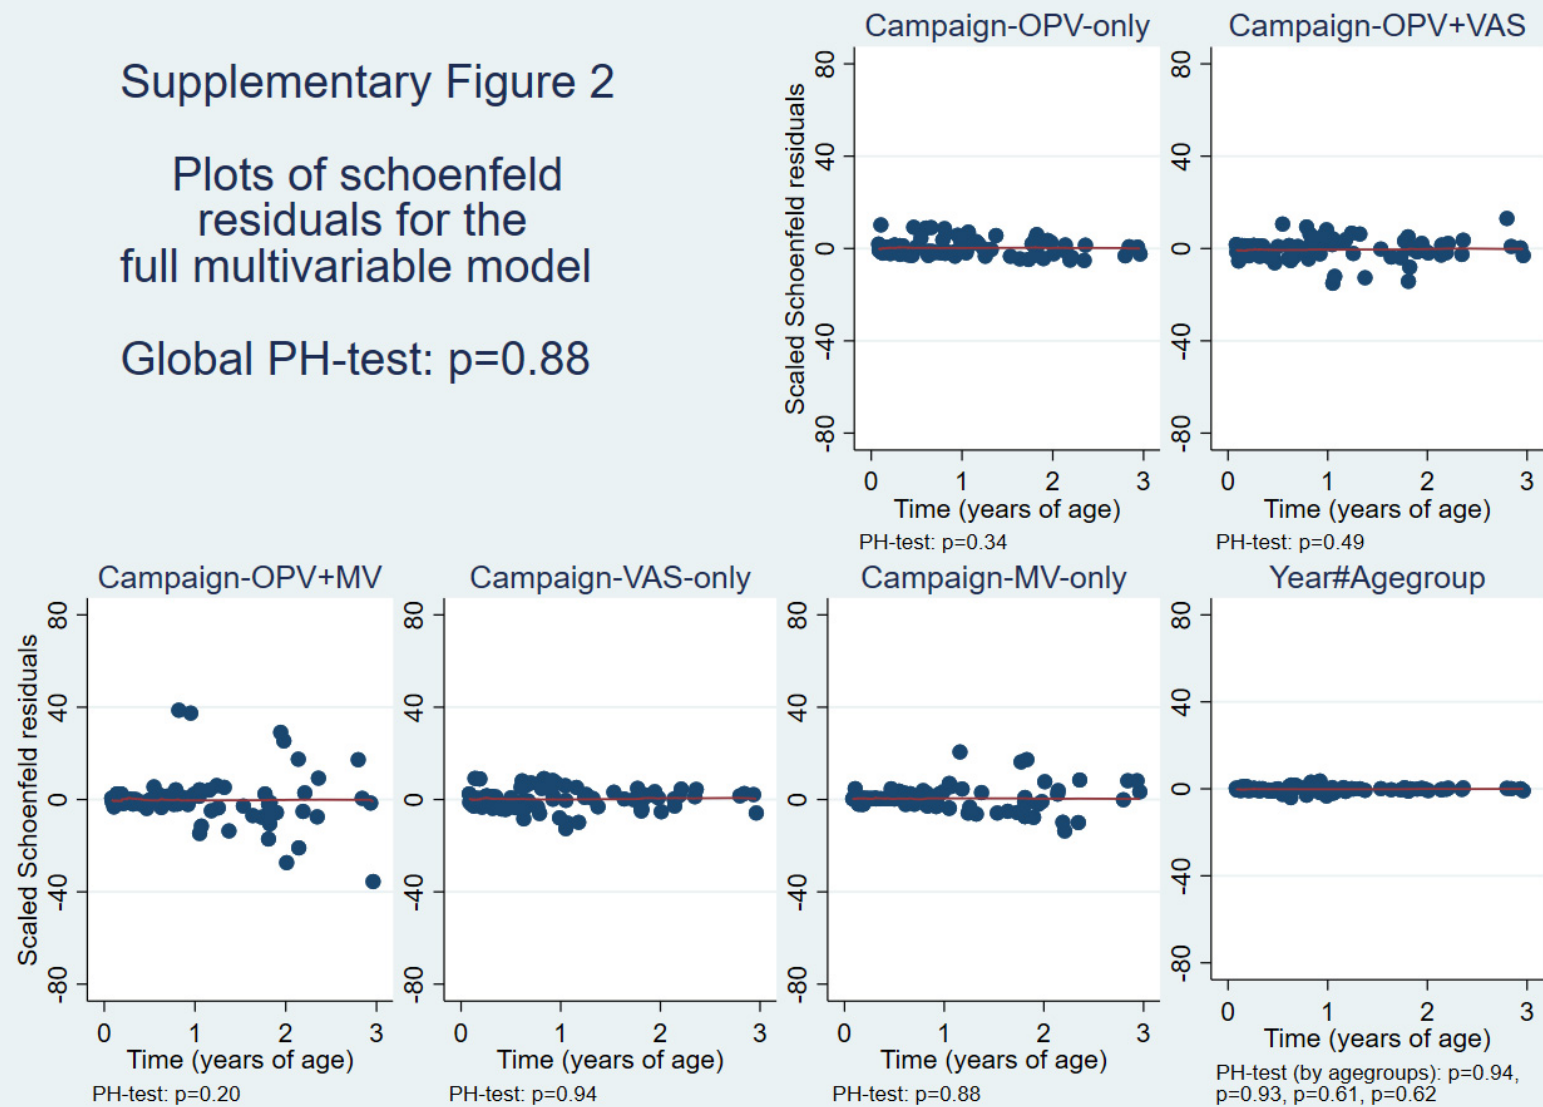

Supplement: s1 [file s1]
